# Supplementary material
Source: PubMed Central journal article supplement (PMC2919134)

## Supplementary Figures

### Evolution of substrate specificity within a diverse family of $\beta/\alpha$ -barrel fold basic amino acid decarboxylases: X-ray structure determination of enzymes with specificity for L-arginine and carboxynorspermidine

Xiaoyi Deng<sup>§</sup>, Jeongmi Lee<sup>‡</sup>, Anthony J. Michael<sup>§</sup>, Diana Tomchick<sup>†</sup>, Elizabeth J. Goldsmith<sup>†</sup> and Margaret A. Phillips<sup>§\*</sup>

Figure 1S. Fo – Fc maps for VvADC and CjCANSDC showing the PLP and ligand-binding sites. A) ADC PLP density, B) ADC agmatine density, C) CANSDC PLP density, D) CANSDC norspermidine density E) CANSDC glycerol density. The difference maps for PLP were contoured at  $\pm 3.0$  sigma and for the other ligands at  $\pm 2.0$  sigma. The coordinates shown are the final structure models. The maps are plotted before the ligands were built into the model. Positive density is shown in green, negative density in red. PLP is shown in pink, amino acid side chains and bound reaction products are shown in yellow, glycerol is shown in pink.

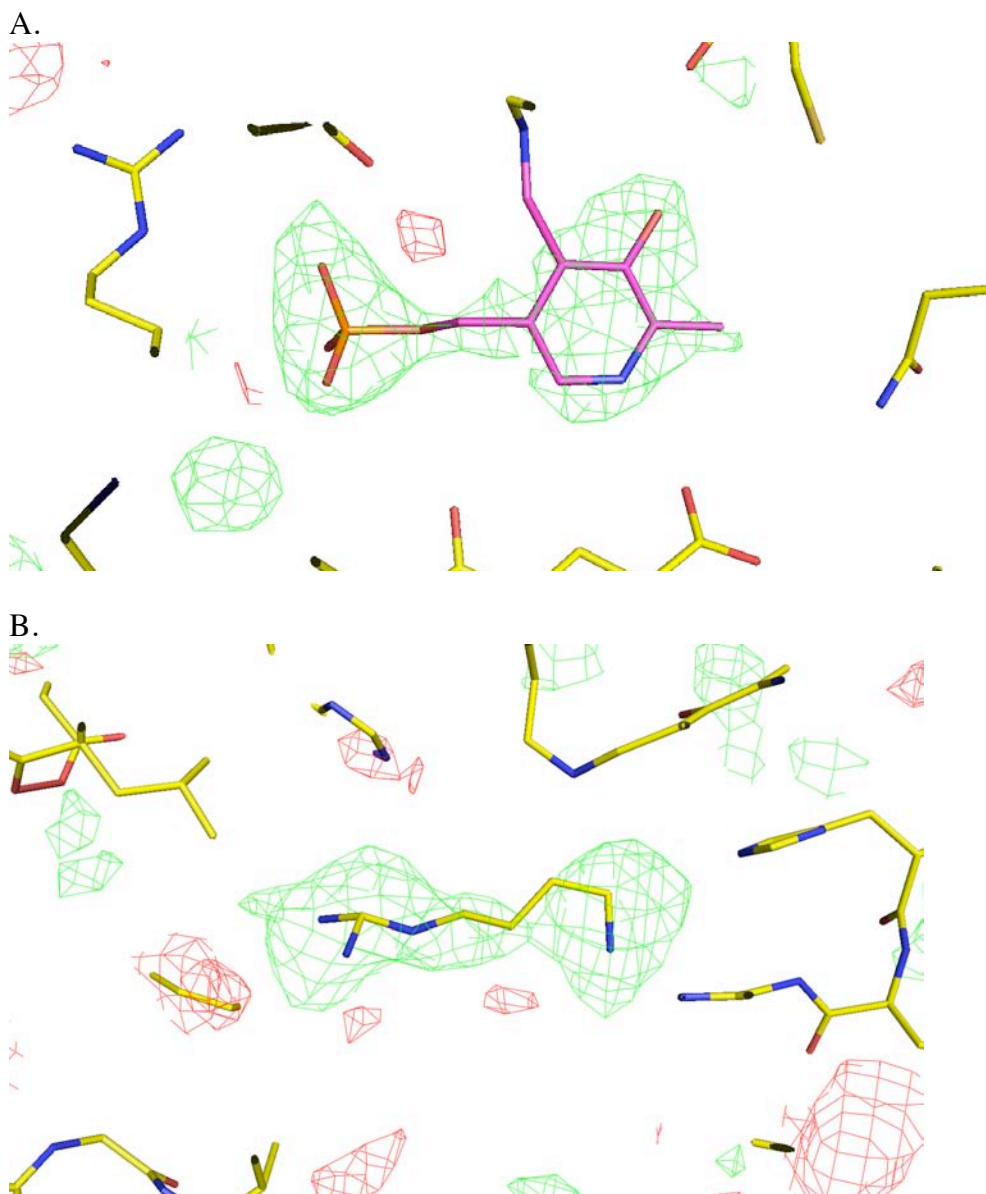

C.

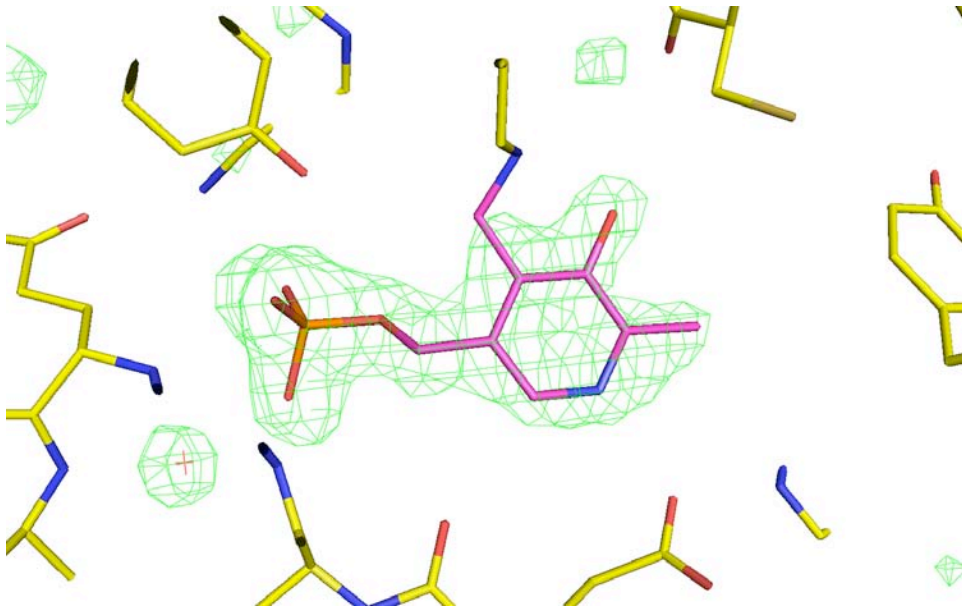

D.

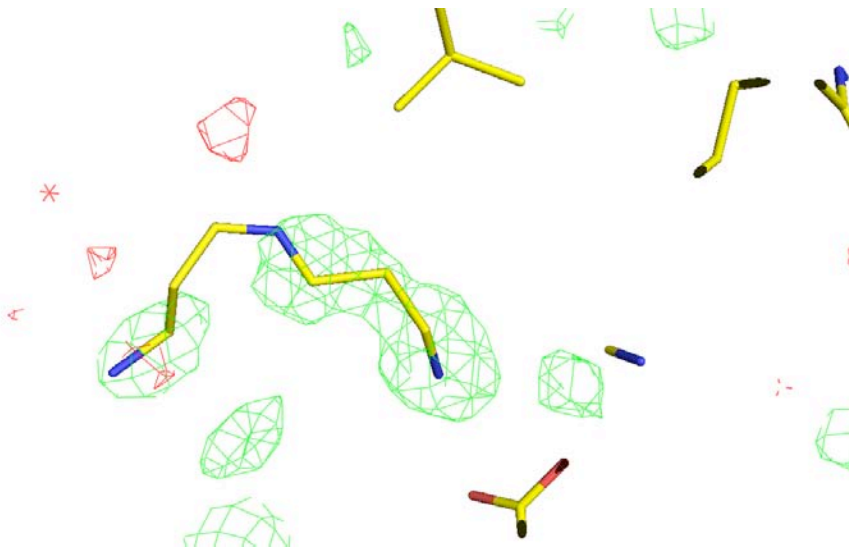

E.

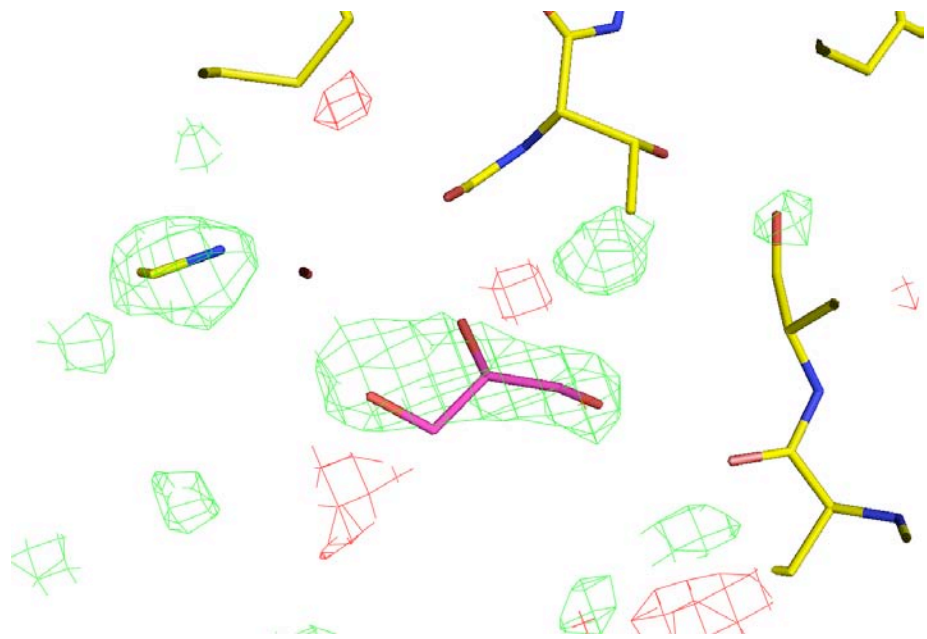



|          | β10                                                                 | α11                  | β11 |  |
|----------|---------------------------------------------------------------------|----------------------|-----|--|
| VvADC    | YCELRTLG-ANITYFDVGGGLAIDYDGTRSQSSNSMNYGLVEYARNIVNTVGDVCKDYKQPMPFVLI | ESG                  | 345 |  |
| TbODC    | FDMGTELG-FNMHILDIGGGFPGTRDA-----PLKFEETIAGVINNALEKHF                | FP--PDLKLTIVAE       | 276 |  |
| CvADC    | FNEAISVG-HKPYILDIGGGLHADID-----GELSTYMSDYINDAIKDFFP                 | ---EDTVTIVAE         | 254 |  |
| VvLODC   | MEQVVERGLPALSTLDIGGGFPVNYTQQ-----VMPIDQFCAPINEALSLLP                | ----ETVHVLA          | 272 |  |
| MjdAPDC  | VVELKEEG-IEIEDVNLGGGLGIPYKDKQ-----IPTQKDLADAIINTMLKYKD              | --KVEMPNLILE         | 306 |  |
| CjCANSDC | FGKWI----GQMKWVNFGGGHITK-----KGY--DVEKLI                            | ALCKNFSD--K-YGVQVYLE | 235 |  |

α<sub>3-10</sub>                      β8                                              α8                                              β9

|          | α12                                                                 | β12        | α13 | α14 |     |
|----------|---------------------------------------------------------------------|------------|-----|-----|-----|
| VvADC    | RSLTAHHAVLISNVIGTETYKPETVTEPEEDFPLLLNNMWRSWLNLHNGTDARALIEIYNDTQSDLA |            |     |     | 415 |
| TbODC    | RYYVASAFTLAVNVI                                                     | AKKVT----- |     |     | 296 |
| CvADC    | RFFAEHYSVLATQVIGKRV                                                 |            |     |     | 274 |
| VvLODC   | RFICAPAVTSVASVMQAER                                                 |            |     |     | 292 |
| MjdAPDC  | RSLVATAGYLLGKVHHIKET                                                |            |     |     | 326 |
| CjCANSDC | EAVGWQTGNLVASVVDI                                                   | IEN-----   |     |     | 255 |

α9                                              β10

|          | α15        | α16         | β13               | α17             | α18                   |     |
|----------|------------|-------------|-------------------|-----------------|-----------------------|-----|
| VvADC    | SQFATGVLTL | LEHRAWAEQTS | LRIYYELNRLMSTKNRF | HRPILDELSE      | RLADKFFVNFSLFQSLPDSWG | 485 |
| TbODC    | -----      | -----       | -----             | QSFMYVNDGVYGS   | FN                    | 333 |
| CvADC    | -----      | -----       | -----             | DGLYEYFFNE      | STYGGFSNVIFEK         | 297 |
| VvLODC   | -----      | -----       | -----             | EGQIWYYLDDGIYGS | SFSGLMFDD             | 315 |
| MjdAPDC  | -----      | -----       | -----             | PVTKWVMI        | DAG-MNDMMRPAMY        | 348 |
| CjCANSDC | -----      | -----       | -----             | EKQIAILD        | TSEAHMPDTIIMP         | 277 |

β11                      α10                      α11

|          | β14                                      | α19                 | β15                 | β16        | β17 | β18 | β19 |     |
|----------|------------------------------------------|---------------------|---------------------|------------|-----|-----|-----|-----|
| VvADC    | QVFPVLPL-----SGLQ-NAADRR                 | AVMLDITCDS          | DGAIDAYVDGQGIESTLPV | -PAWNEDEPY | LMG |     |     | 544 |
| TbODC    | AVVRPLPQ-----REPIPNEKLYPSSVWGPTCDGLDQIVE | -----RYYL-PEMQV     | --GEWLL             |            |     |     |     | 382 |
| CvADC    | SVPTPQLL-----RDVPDDEEYVPSVLYGCTCDGVDVINH | -----NVAL-PELHI     | --GDWVY             |            |     |     |     | 346 |
| VvLODC   | ARYPLTTI-----K---QGGE                    | LIPSVLSGPTCDSVDVIAE | -----NILL-PKLNN     | --GDLVI    |     |     |     | 361 |
| MjdAPDC  | AYHHIINC-----K---VKNEKEVVS               | IAGGLCESSDVFGR      | -----DREL-DKVEV     | --GDVLA    |     |     |     | 394 |
| CjCANSDC | YTSEVLNARILATRENEKISDLKENE               | FAYLLTGNTCLAGDVMG   | -----EYAFDKKLKI     | --GDKIV    |     |     |     | 335 |

β12                                              β13                                              β14                                              β15

|          | $\alpha 20$                                                            | $\alpha_{3-10}3$ | $\beta 20$ | $\beta 21$ | $\alpha 21$ | $\alpha 22$ |     |
|----------|------------------------------------------------------------------------|------------------|------------|------------|-------------|-------------|-----|
| VvADC    | FFLVGAYQEILGDMHNLFGDTHSVVVNVGDQGEINIDFINEGDTVEDMMRYVHIDVDQIRKNYHSLVSQR |                  |            |            |             |             | 614 |
| TbODC    | FEDMGAYTVVGTSSFNGFQSPTIYYVV-----                                       |                  |            |            |             |             | 409 |
| CvADC    | FPSWGAYTNVLTTSFNGFGEYDVYYI-----                                        |                  |            |            |             |             | 372 |
| VvLODC   | GRTMGAYTSATATDFNFFKRAQTIALNEF-----                                     |                  |            |            |             |             | 390 |
| MjdAPDC  | IFDVGAYGISMANNYNARGRPRMVLTSKK-----GVFLIRERETYADLIAKDIVPHELL-----       |                  |            |            |             |             | 448 |
| CjcANSDC | FLDQIHYTIVKNITTFNGIRLPNLMLLDHK----NELQMIR-EFSYKDYSLRN-----             |                  |            |            |             |             | 382 |

| $\alpha_{3-10}4$ | $\alpha_{3-10}5$ | $\beta 16$ | $\beta 17$ | $\alpha 12$ |
|------------------|------------------|------------|------------|-------------|
|------------------|------------------|------------|------------|-------------|

|          | $\alpha 23$               |     |
|----------|---------------------------|-----|
| VvADC    | VDQEEQQQILAELEQGLSGYTYLED | 639 |
| TbODC    | -----                     |     |
| CvADC    | -----                     |     |
| VvLODC   | -----                     |     |
| MjdAPDC  | -----                     |     |
| CjcANSDC | -----                     |     |

Figure 3. Sedimentation velocity analysis of *VvADC*. A. Velocity sedimentation was performed using a charcoal-filled dual sector centerpiece and scans are recorded at fixed intervals. An-50 Ti rotor was used at speed of 45,000 RPM and scans are displayed at 4 minute intervals (progressing from left to right on the plot). Three *VvADC* concentration of 0.1, 0.4 and 0.8 OD were used in the experiment. Data is only displayed for the 0.8 OD sample. B. Corresponding  $c(s)$  distribution. Model of continuous  $c(s)$  distribution and fitting option of Marquardt Levenberg were applied in the Sedfit analysis to determine the MW. The first 30 scans of *VvADC* were used in the calculation.

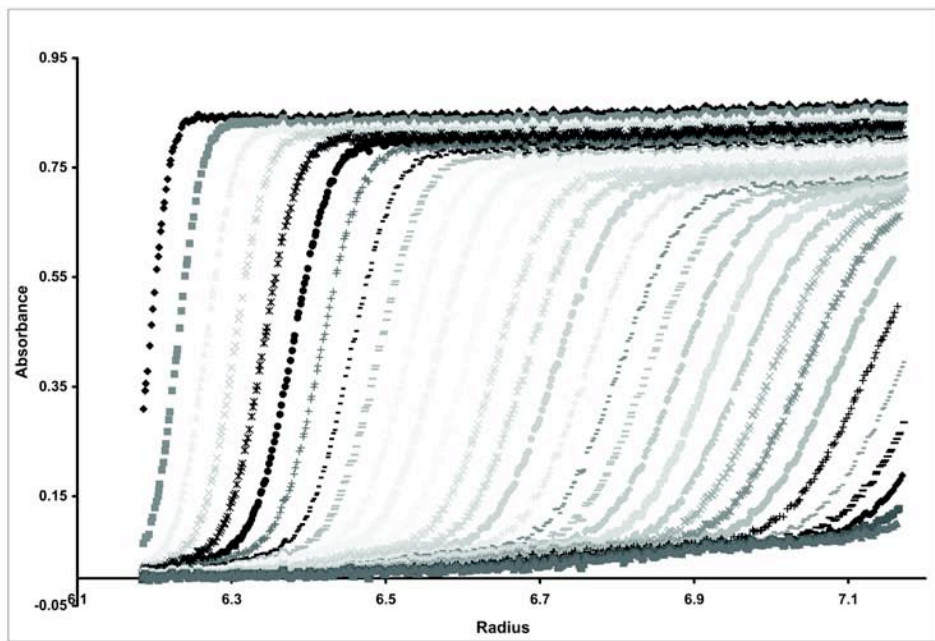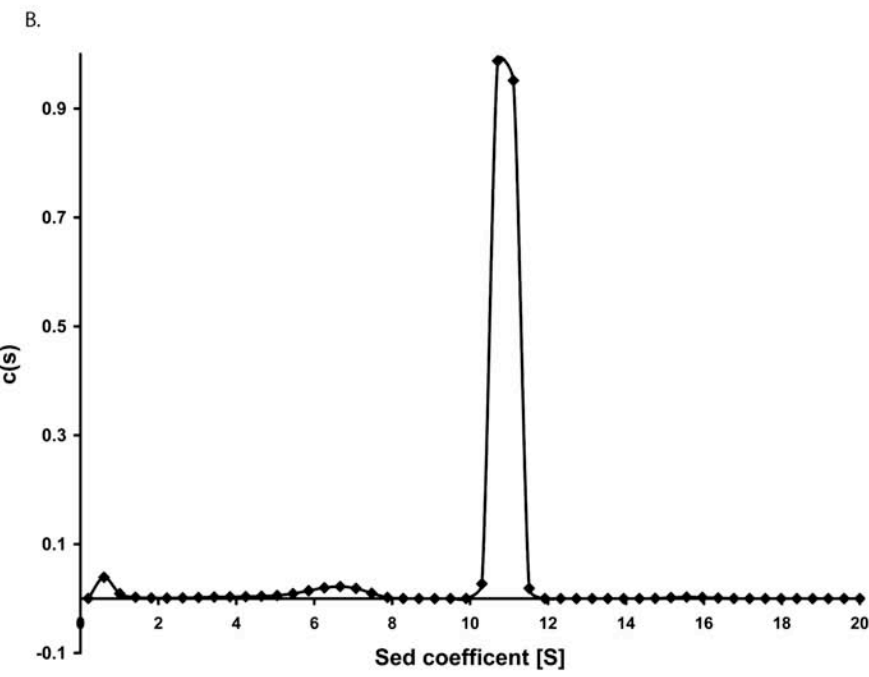

Figure 4S. Ribbon diagram of the *Cj*CANSDC structure aligned with *Tb*ODC shown from the back-side. The two *Cj*CANSDC monomers are shown in teal and light blue respectively, while the two *Tb*ODC monomers are in tan and grey. The C-terminal extension (C) that forms the novel dimer interface in *Cj*CANSDC is marked.

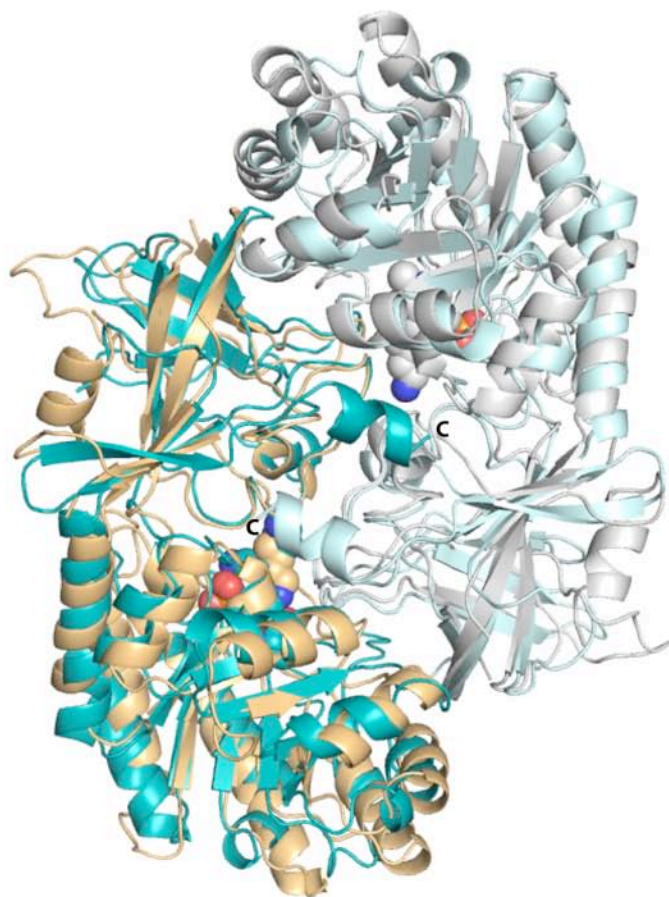

Supplement: supp_M110.121137_jbc.M110.121137-1.pdf [file supp_M110.121137_jbc.M110.121137-1.pdf]
